# Supplementary material for: Is mHealth a Useful Tool for Self-Assessment and Rehabilitation of People with Multiple Sclerosis? A Systematic Review
Source: Brain Sci. 2021 Sep 9;11(9):1187. doi: 10.3390/brainsci11091187 (PMC8466296; doi:10.3390/brainsci11091187)
Supplement: Supplementary file 1 [file brainsci-11-01187-s001.zip › brainsci-1338516-supplementary.pdf]

**Table S1:** Search strategy for PubMed

|                       | <b>MeSH term</b>                                                                                                                                                                                                                                                                     | <b>Hits</b> |
|-----------------------|--------------------------------------------------------------------------------------------------------------------------------------------------------------------------------------------------------------------------------------------------------------------------------------|-------------|
| #1 population         | (multiple sclerosis) OR (ms) OR (multiple sclerosis[MeSH Terms])                                                                                                                                                                                                                     | 510,099     |
| #2 mHealth tool       | (ehealth[MeSH Terms]) OR (ehealth) OR (mhealth) OR (mobile apps) OR (smartphone applications) OR (apps)                                                                                                                                                                              | 68,807      |
| #3 disease management | (self-monitoring) OR (self- assessment) OR (functioning) OR (intervention) OR (rehabilitation)                                                                                                                                                                                       | 19,493,401  |
| #1 AND #2 and #3      | ((multiple sclerosis) OR (ms) OR (multiple sclerosis[MeSH Terms])) AND ((ehealth[MeSH Terms]) OR (ehealth) OR (mhealth) OR (mobile apps) OR (smartphone applications) OR (apps)) AND ((self-monitoring) OR (self-assessment) OR (functioning) OR (intervention) OR (rehabilitation)) | 1,063       |

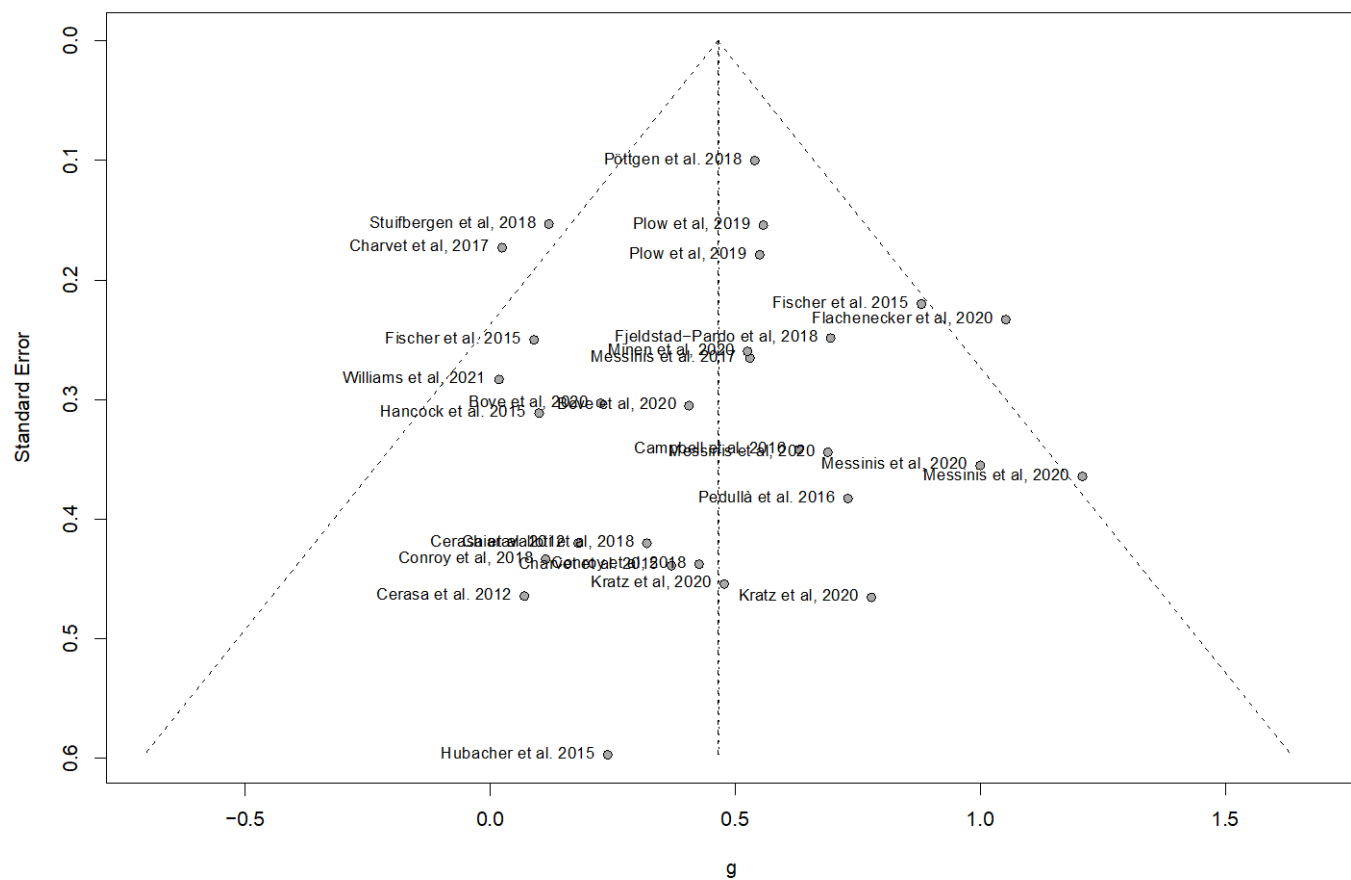

**Figure S1.** Funnel plot of the included studies in the meta-analysis

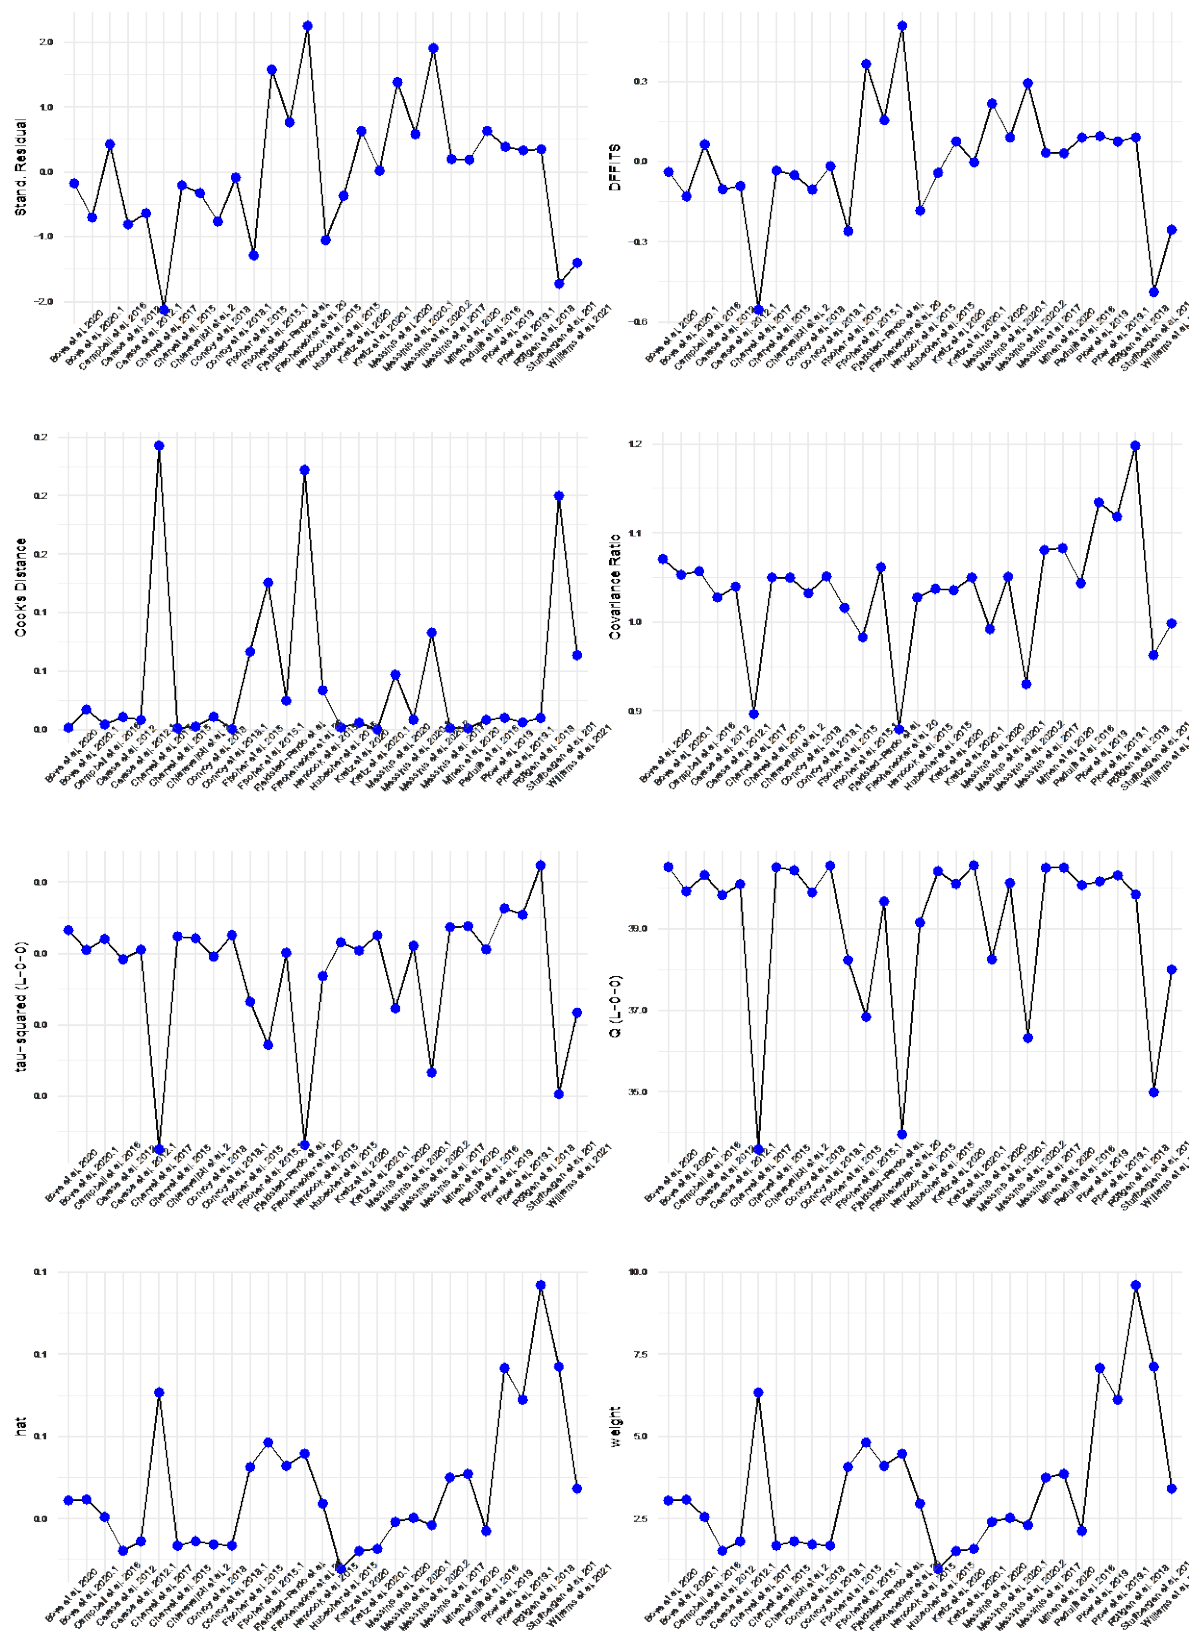

**Figure S2.** Sensitivity analysis of the included studies in the meta-analysis
